# Supplementary material for: MAFB shapes human monocyte–derived macrophage response to SARS-CoV-2 and controls severe COVID-19 biomarker expression
Source: PubMed Central journal article supplement (PMC10807725; doi:10.1172/jci.insight.172862), 2023-12-22

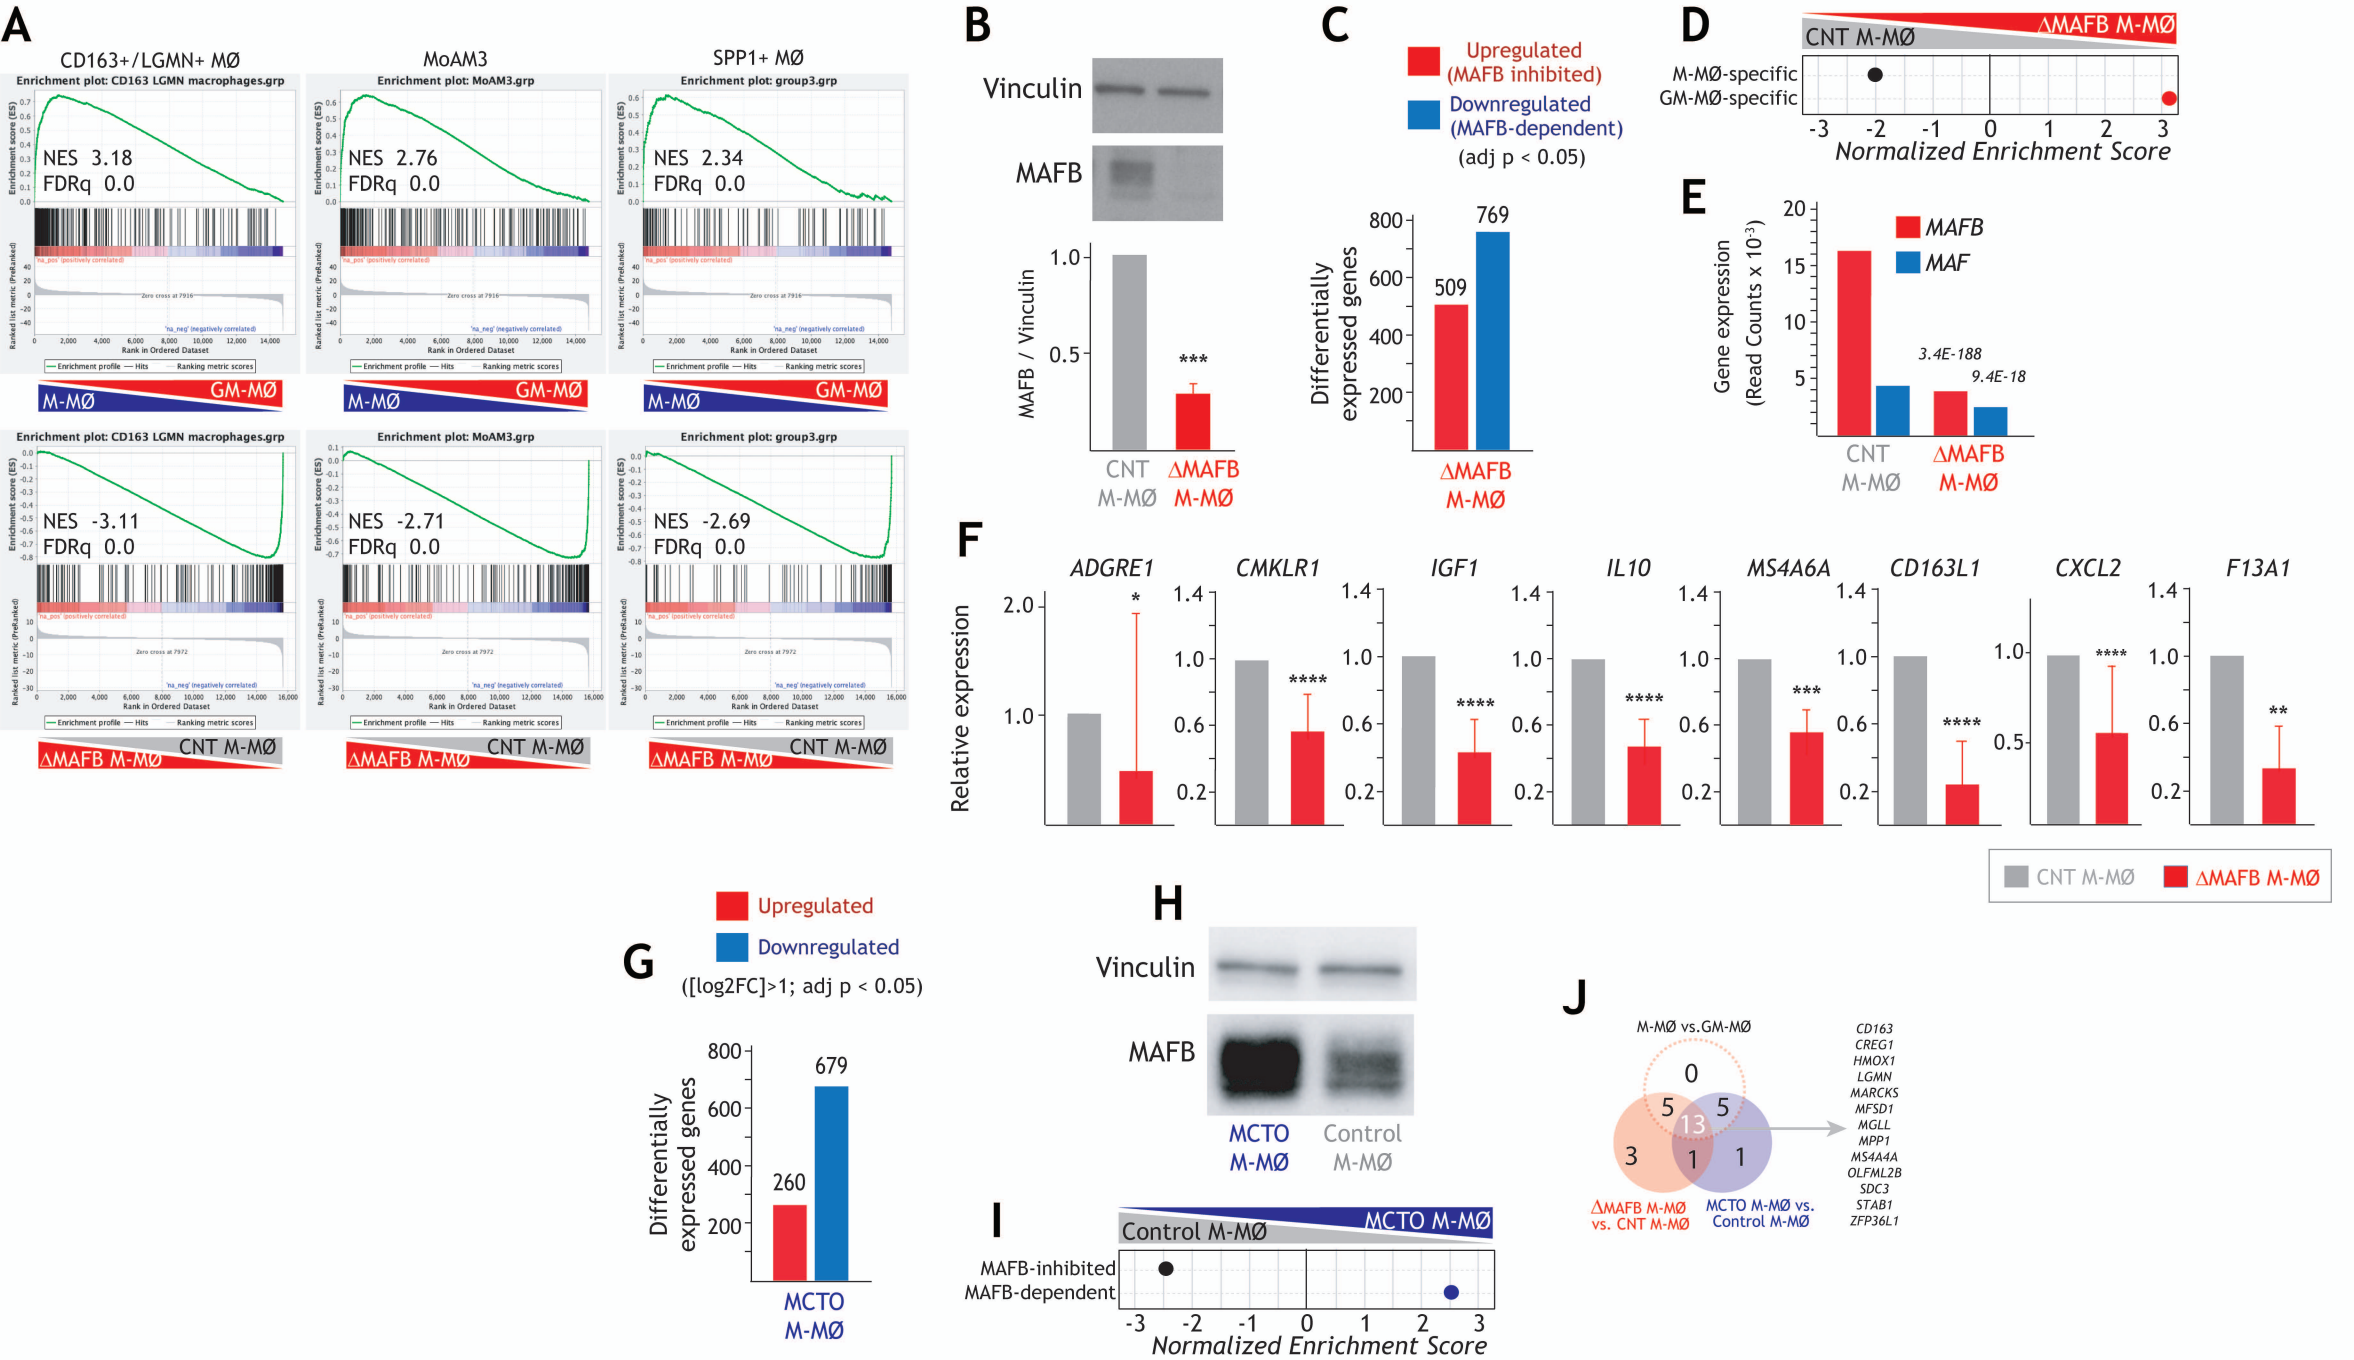

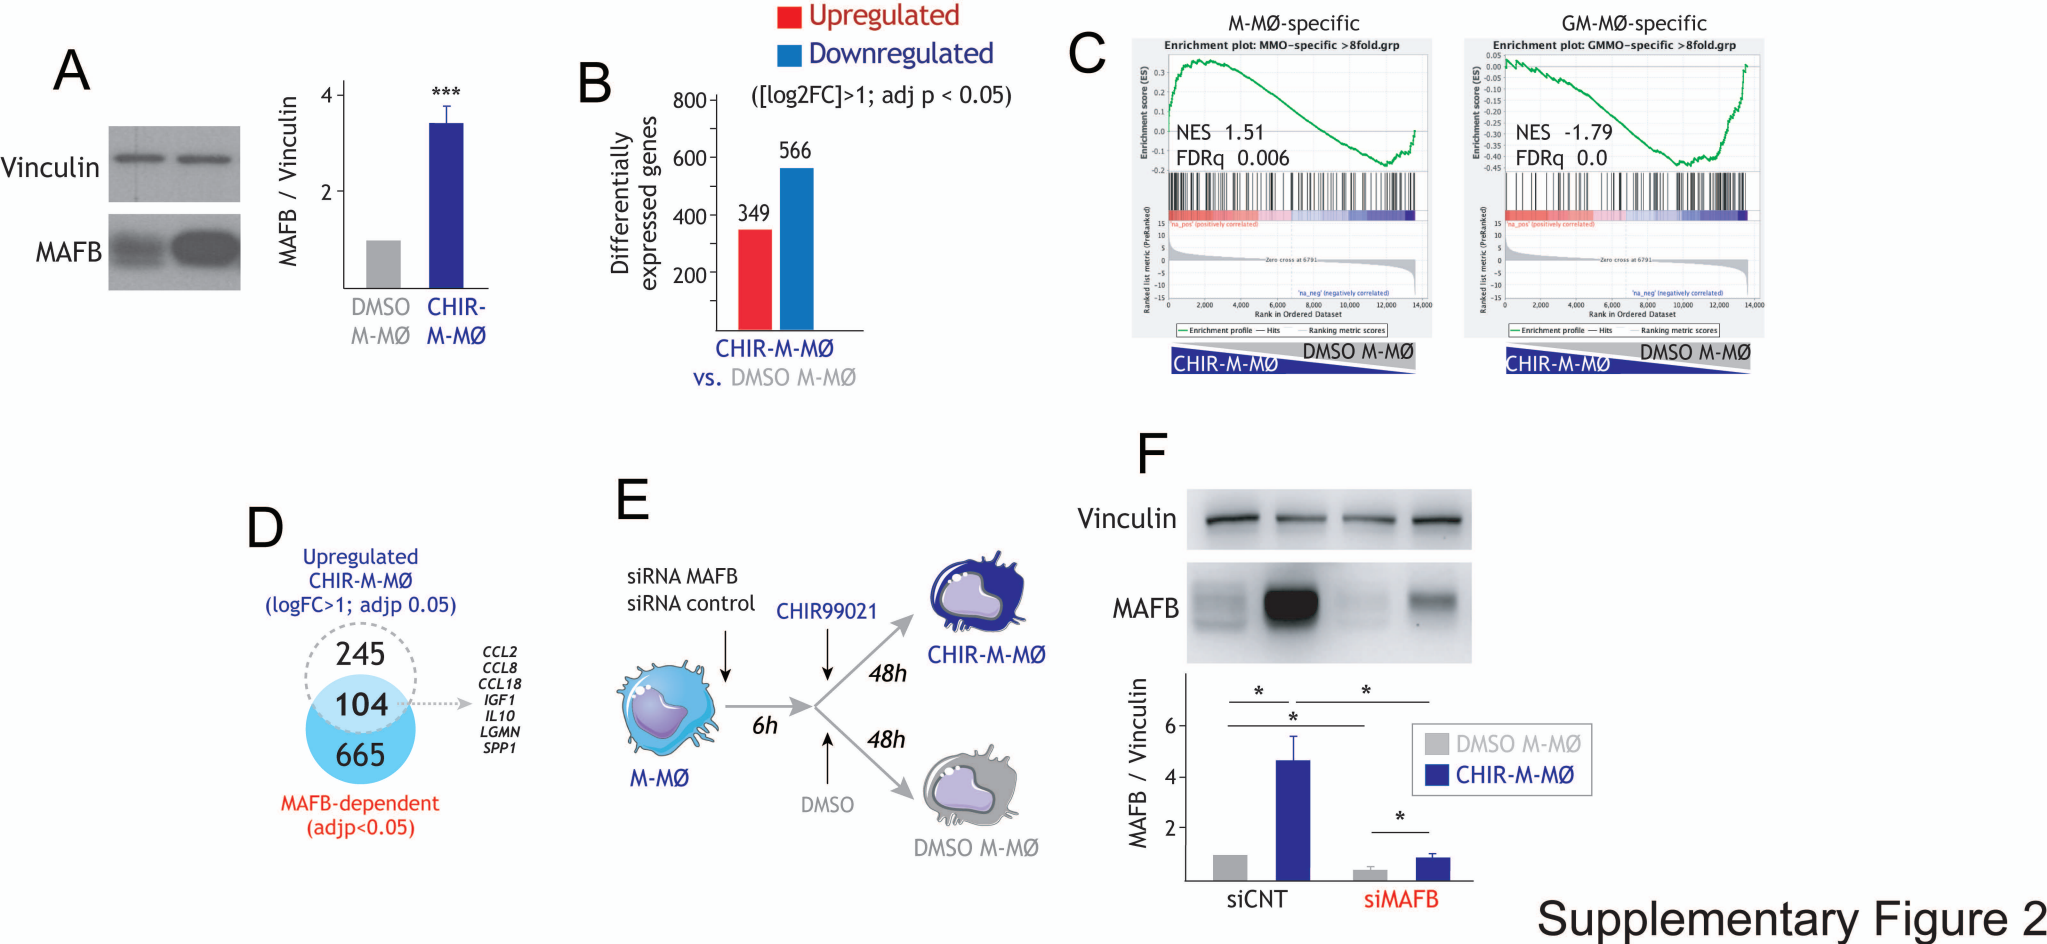

**A****SARS-CoV-2 fragments**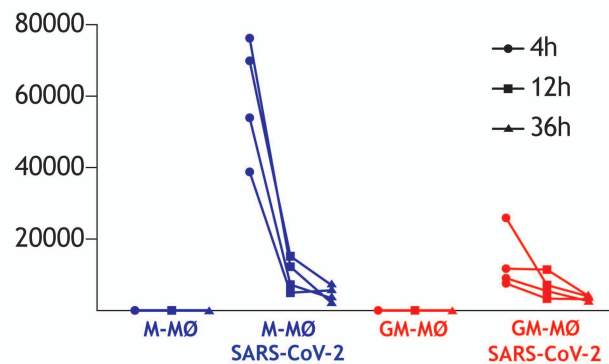**B**

*Shaath et al Cells 9:2374, 2020*  
Severe BALF > Mild BALF  
Severe BALF > Healthy BALF  
Mild BALF > Healthy BALF

*Xu et al Cell Discovery 6:73, 2020*  
Severe BALF > Mild BALF  
Severe BALF < Mild BALF

*Melms et al Nature 595:114, 2021*  
MDM COVID19 > Control  
MDM COVID19 < Control  
Transitional MDM COVID19 > Control  
Transitional MDM COVID19 < Control  
Alveolar Macs COVID19 > Control  
Alveolar Macs COVID19 < Control

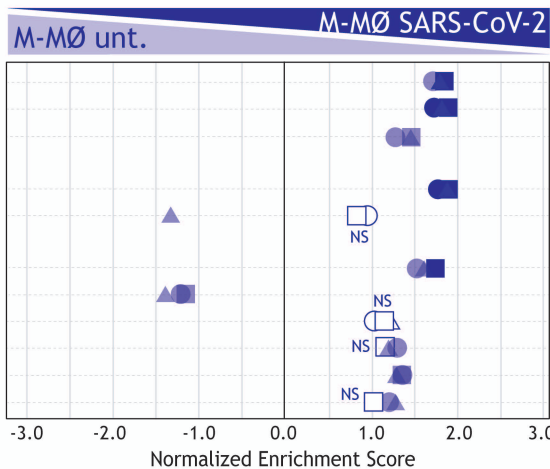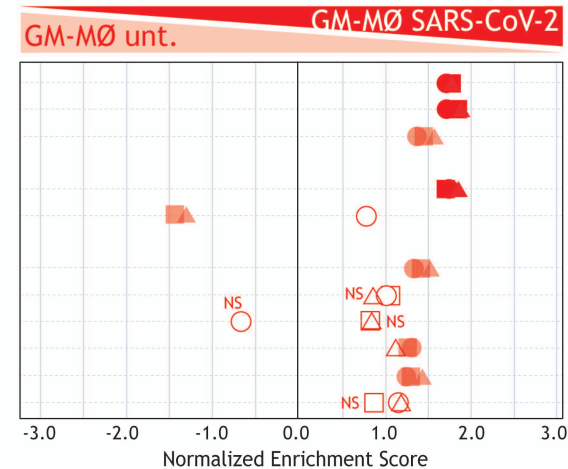

● 4h  
▲ 12h  
■ 36h  
Solid color, FDRq=0.0  
Light color, FDRq<0.250

**C**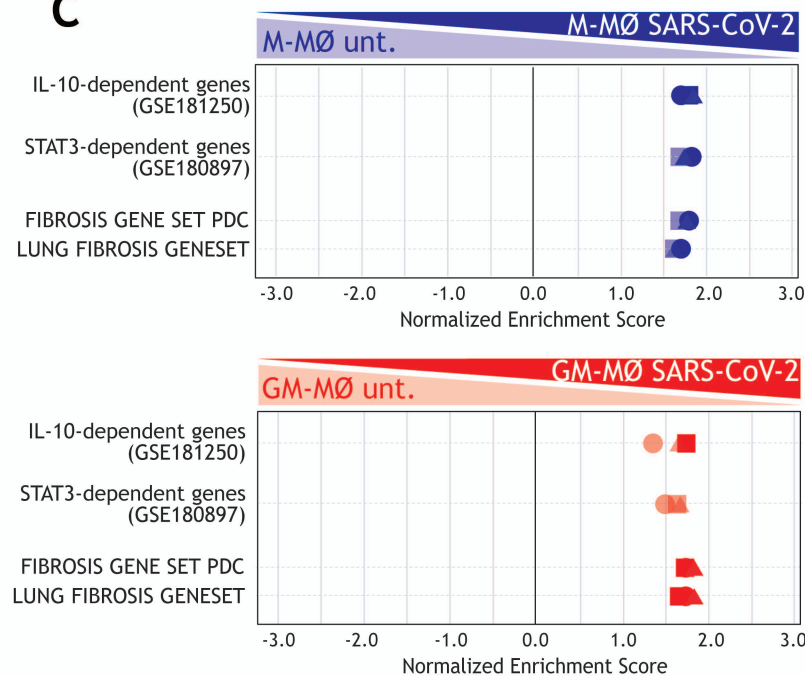**D**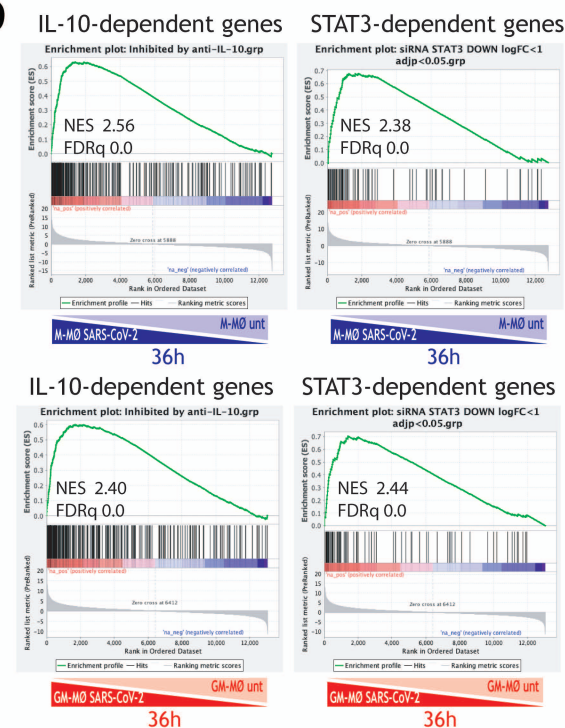

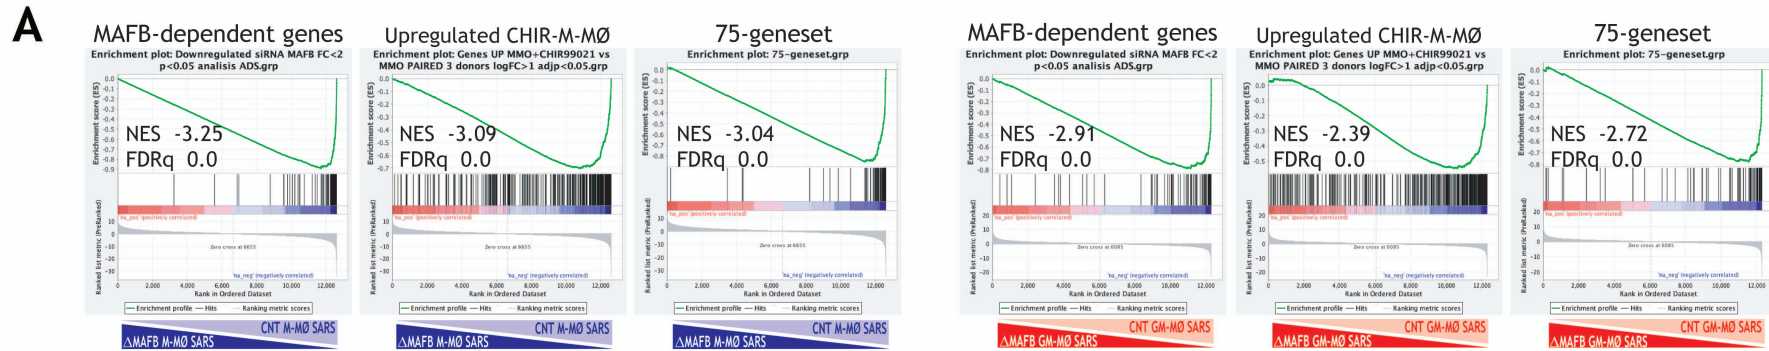

**B** MAFB-inhibited genes

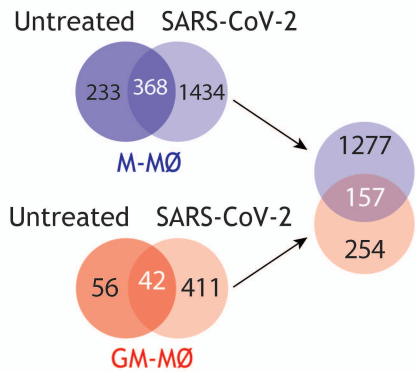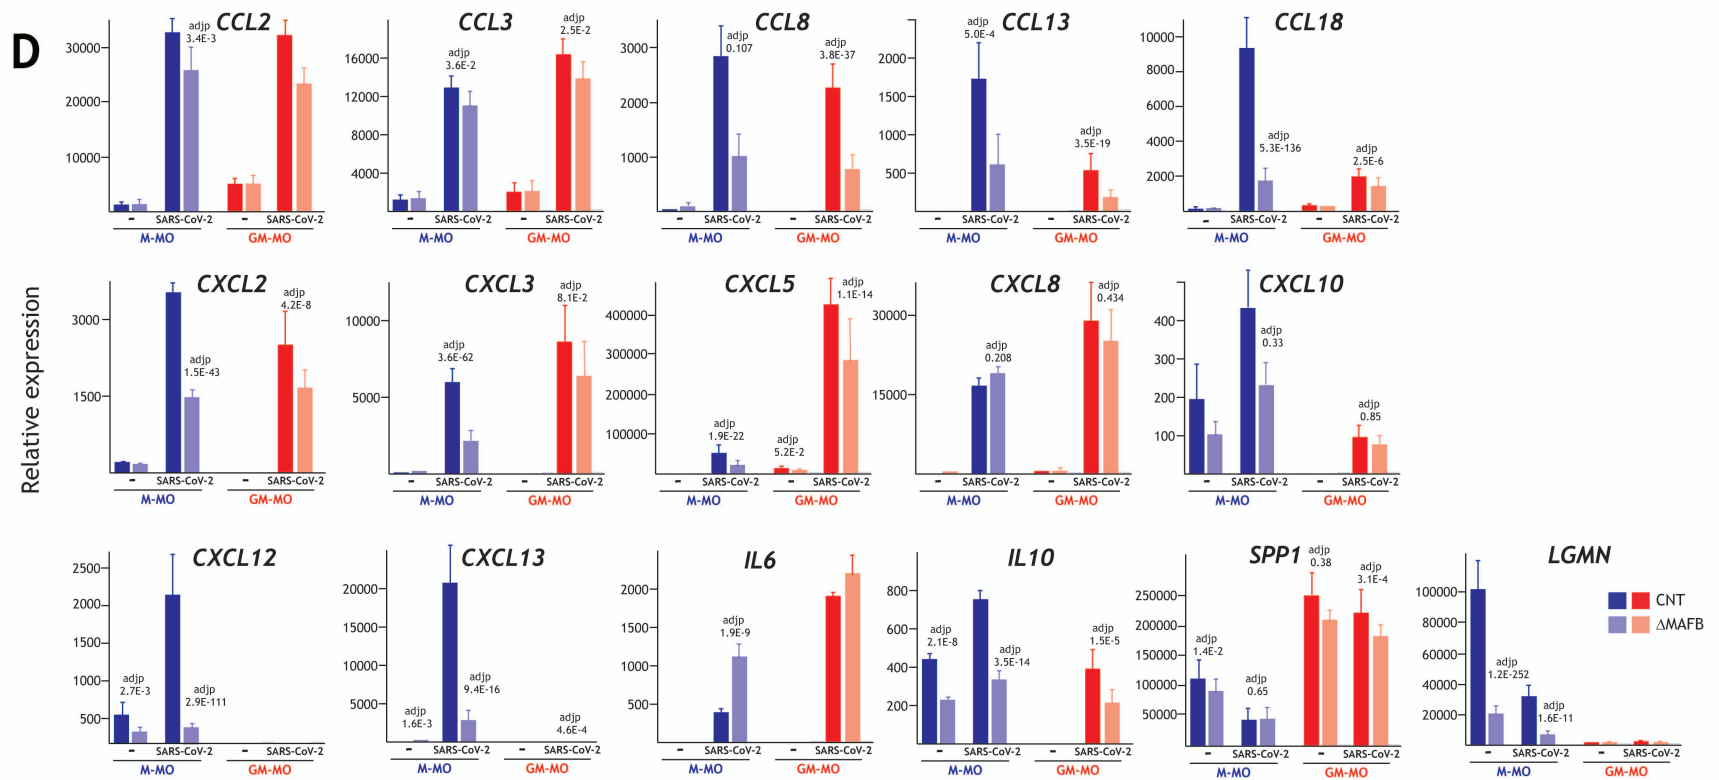

**C** MAFB-dependent genes

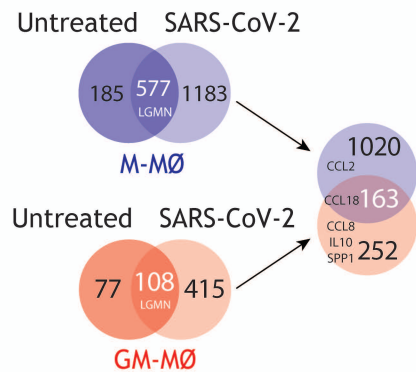

Supplement: jciinsight-8-172862-s080.pdf [file jciinsight-8-172862-s080.pdf]
